# Supplementary material for: La representación de los meses del año en la capilla de San Galindo: Campisábalos ( Gadalajara )
Source: publisher site journal article supplement (doi:10.18632/aging.102472), 1985-01-01
Supplement: Supplementary file [file aging-v11i22-102472-supplementary-material-SD1.pdf]

**SUPPLEMENTARY FIGURE**

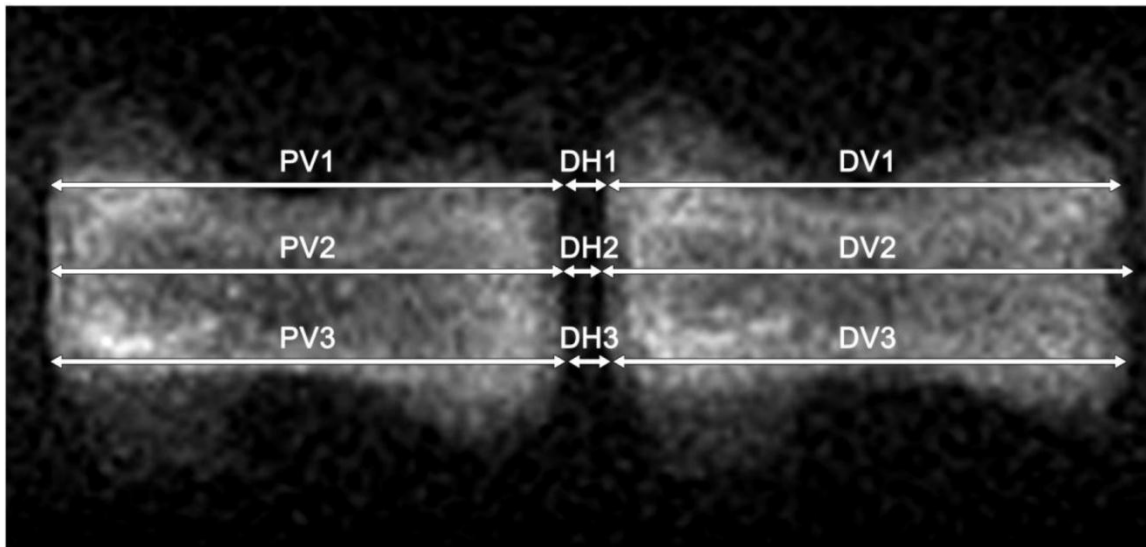

**Supplementary Figure 1.** Measurement of disc height on X-ray film (PV: proximal vertebral body; DH: disc height; DV: distal vertebral body).
