# Supplementary material for: La representación de los meses del año en la capilla de San Galindo: Campisábalos ( Gadalajara )
Source: publisher site journal article supplement (doi:10.18632/aging.102472), 1985-01-01
Supplement: Supplementary file [file aging-v11i22-102472-supplementary-material-SD2.pdf]

## SUPPLEMENTARY TABLE

**Supplementary Table 1. Modified MRI grading according to Pfirrmann.**

| <b>Grade</b> | <b>Structural changes within NP</b> | <b>Intervertebral disc height</b> |
|--------------|-------------------------------------|-----------------------------------|
| I            | Homogenous and bright               | Normal                            |
| II           | Heterogenous                        | Normal                            |
| III          | Heterogenous and grey               | Decreased                         |
| IV           | Heterogenous and black              | Decreased or collapsed            |
